# Supplementary material for: Dreamland—a dream content questionnaire in German based on the English version
Source: Springer Nature journal article supplement (doi:10.1007/s11818-023-00419-2), 2023-08-15
Supplement: MOESM1 [file 25925332]

# **DREAMLAND**

(Version 2.1. G. Klösch, B. Holzinger)

## **1. HABEN SIE IN DER LETZTEN NACHT GETRÄUMT?**

- ☐ Nein, ich habe nicht geträumt.
- ☐ Ja, ich habe geträumt, kann mich aber an nichts mehr erinnern.
- ☐ Ja, ich habe geträumt, kann mich aber an keine Details mehr erinnern.
- ☐ Ja, ich habe geträumt und kann mich auch an Details noch erinnern.
- ☐ Ich bin mir nicht sicher, ob ich geträumt habe.

## **2. AN WIE VIELE TRÄUME WÄHREND DER LETZTEN NACHT KÖNNEN SIE SICH ERINNERN?**

- ☐ An gar keinen Traum
- ☐ An einen Traum
- ☐ An zwei Träume
- ☐ An mehr als zwei Träume
- ☐ Ich weiß es nicht

**DIE NÄCHSTEN FRAGEN BITTE NUR BEANTWORTEN, WENN SIE ETWAS GETRÄUMT HABEN, ODER SICH ZUMINDEST AN EINIGE DETAILS ERINNERN KÖNNEN.**

## **3. WIE LANGE HABEN SIE INSGESAMT GETRÄUMT?**

- ☐ Weniger als 5 Minuten
- ☐ 5 - 10 Minuten
- ☐ 11 - 30 Minuten
- ☐ Mehr als 30 Minuten
- ☐ Ich weiß es nicht

## **4. WANN HABEN SIE GETRÄUMT (MEHRFACHANTWORT MÖGLICH)?**

- ☐ Erstes Nachtdrittel
- ☐ Zweites Nachtdrittel
- ☐ Drittes Nachtdrittel
- ☐ Ich weiß es nicht

## 5. WAR IHR ZEITEMPFFINDEN WÄHREND DES TRÄUMENS ...

- ☐ ... genauso wie im Wachzustand
- ☐ ... verlängert/verlangsamt
- ☐ ... verkürzt/beschleunigt
- ☐ ... Ich weiß es nicht

## 6. WIE VIEL IST IHNEN VOM TRAUMGESCHEHEN NOCH IN ERINNERUNG?

- ☐ Alles bzw. fast alles
- ☐ Mehrere Details/Episoden
- ☐ Wenige Details/Episoden
- ☐ Nur ein einziges Detail
- ☐ Ich kann mich an keine Details mehr erinnern

## 7. SIND SIE AUFGRUND DES TRAUMES AUFGEWACHT?

- ☐ Ja
- ☐ Nein
- ☐ Ich weiß es nicht

### 7.1 WENN JA, WAR DAS WIEDEREINSCHLAFEN DADURCH ERSCHWERT?

- ☐ Ja
- ☐ Nein
- ☐ Ich weiß es nicht

***Bitte wählen Sie nun den Traum, der für Sie am eindrucklichsten war in dieser Nacht und notieren Sie ihn hier so detailreich wie möglich:***

**CHARAKTERISIEREN SIE BITTE NUN ANHAND FOLGENDER PUNKTE DEN TRAUM DER LETZTEN NACHT, DEN SIE VORHER NOTIERT HABEN (MEHRFACHANTWORTEN MÖGLICH)**

## 8. WAS KAM IN IHREM TRAUM VOR?

- |                                               |                                          |
|-----------------------------------------------|------------------------------------------|
| <input type="checkbox"/> Freunde              | <input type="checkbox"/> Bekannte        |
| <input type="checkbox"/> Verwandte            | <input type="checkbox"/> Fremde          |
| <input type="checkbox"/> Kollegen/Arbeitgeber | <input type="checkbox"/> Eigenes Zuhause |

- ☐ vertraute Gebäude
- ☐ bekannte Städte/Orte
- ☐ unbekannte Städte/Orte
- ☐ unbestimmbare Orte
- ☐ Natur/Landschaften
- ☐ bekannte Gegenstände
- ☐ unbekannte/nicht bestimmbare Gegenstände

- ☐ Fahrzeuge
- ☐ Tiere
- ☐ Pflanzen
- ☐ unbekannte/nicht bestimmbare Lebewesen
- ☐ andere: \_\_\_\_\_

### 9. BEZOG SICH DER INHALT DES TRAUMES AUF ....

- ☐ ... eine bekannte Alltagssituation
- ☐ ... ein aktuelles Tagesereignis
- ☐ ... ein Ereignis aus der jüngeren Vergangenheit
- ☐ ... ein Ereignis aus der Kindheit
- ☐ ... ein zukünftiges Ereignis
- ☐ ... kein bekanntes bzw. erinnerbares Ereignis

### 10. ERSCHIEN DAS TRAUMGESCHEHEN ...

|                        |                       |
|------------------------|-----------------------|
| -----                  | -----                 |
| fremdartig             | bekannt, vertraut     |
|                        |                       |
| -----                  | -----                 |
| bizarr, unverständlich | logisch, verständlich |
|                        |                       |
| -----                  | -----                 |
| farbig, bunt           | farblos, schwarz-weiß |

**Wenn farbig, welche Farbe war während des Traumes vorherrschend?** \_\_\_\_\_

|                  |                |
|------------------|----------------|
| -----            | -----          |
| angenehm         | unangenehm     |
|                  |                |
| -----            | -----          |
| fröhlich, lustig | ernst, traurig |

|                             |                             |
|-----------------------------|-----------------------------|
| -----                       |                             |
| entspannend, erfreulich     | beängstigend, bedrohlich    |
| -----                       |                             |
| liebevoll, einfühlsam       | abwehrend, aggressiv        |
| -----                       |                             |
| sexuell, triebhaft          | asexuell, nicht triebhaft   |
| -----                       |                             |
| hoffnungsvoll, optimistisch | hoffnungslos, pessimistisch |

# 11. SCHÄTZEN SIE DAS TRAUMGESCHEHEN NACH SINNESEINDRÜCKEN EIN:

Visuell (optische Eindrücke)

|                        |                         |
|------------------------|-------------------------|
| -----                  |                         |
| ausschließlich visuell | überhaupt nicht visuell |

Akustisch (gehörsmäßig)

|                          |                           |
|--------------------------|---------------------------|
| -----                    |                           |
| ausschließlich akustisch | überhaupt nicht akustisch |

Sprachliche Äußerungen

|                           |                            |
|---------------------------|----------------------------|
| -----                     |                            |
| ausschließlich sprachlich | überhaupt nicht sprachlich |

Musik/Gesang

|                |                 |
|----------------|-----------------|
| -----          |                 |
| ausschließlich | überhaupt nicht |

Geruch/Geschmack

|                |                 |
|----------------|-----------------|
| -----          |                 |
| ausschließlich | überhaupt nicht |

Taktile Wahrnehmung (z. B. Kälte/Wärmeempfinden, Berührung etc.)

|       |  |
|-------|--|
| ----- |  |
|-------|--|

ausschließlich

überhaupt nicht

Körperbezogene Ereignisse (z. B. gehen, laufen, springen, fliegen etc.)

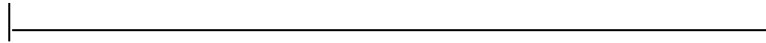

ausschließlich

überhaupt nicht

## 12. WELCHE ROLLE HABEN SIE IN IHREM TRAUM ÜBERNOMMEN?

- ☐ Aktiv am Traumgeschehen teilgenommen
- ☐ Passiv in das Traumgeschehen eingebunden
- ☐ Ich habe dem Traumgeschehen als neutraler Betrachter beigewohnt
- ☐ Ich weiß es nicht

## 13. KLARTRÄUME

*Klarträume sind solche Träume, in denen man völlige Klarheit darüber besitzt, dass man träumt und nach eigenem Entschluss handeln kann.*

### 13.1 Waren Sie sich während des Träumens bewusst, dass Sie träumen?

- ☐ Ja
- ☐ Nein
- ☐ Ich weiß es nicht

### 13.2 Konnten Sie den Traum frei nach eigener Entscheidung beeinflussen?

- ☐ Ja
- ☐ Nein
- ☐ Ich weiß es nicht

## 14. WANN HABEN SIE DEN FRAGEBOGEN BEANTWORTET?

- ☐ direkt nach dem Traum (in der Nacht oder am Morgen)
- ☐ direkt nach dem Aufwachen
- ☐ in der ersten Stunden nach dem Aufwachen
- ☐ in den ersten sechs Stunden nach dem Aufwachen
- ☐ später
